# Supplementary material
Source: ML conference proceedings conference paper supplement (https://proceedings.mlr.press/v161/sannai21a.html)
Supplement: Supplementary file [file sannai21a-supp.pdf]

---

# Improved Generalization Bounds of Group Invariant / Equivariant Deep Networks via Quotient Feature Spaces (Supplementary material)

---

Akiyoshi Sannai<sup>1,2</sup>

Masaaki Imaizumi<sup>3,1</sup>

Makoto Kawano<sup>3</sup>

<sup>1</sup>RIKEN Center for Advanced Intelligence Project, Chuo, Tokyo, Japan

<sup>2</sup>Keio University, Minato, Tokyo, Japan

<sup>3</sup>The University of Tokyo, Bunkyo, Tokyo, Japan

## A SUPPLEMENT

We provide the deferred proofs of each section.

### A.1 PROOF FOR SECTION 3

*Proof of Lemma 1.* For any  $\epsilon > 0$ , there is a sequence of rational numbers  $\{p_i/q_i\}$  such that  $p_i/q_i < \epsilon$  and converges to  $\epsilon$ . Assume that Lemma 1 holds for rational numbers, then we have  $\mathcal{N}_{\epsilon, \infty}(\Delta_{S_n}) \leq \mathcal{N}_{p_i/q_i, \infty}(\Delta_{S_n}) \leq C/(n! (p_i/q_i)^n)$ . Since  $1/x^n$  is a continuous function and  $\{p_i/q_i\}$  converges to  $\epsilon$ , we obtain  $\mathcal{N}_{\epsilon, \infty}(\Delta_{S_n}) \leq C/(n! (\epsilon)^n)$ . Hence it is enough to show the case of rational numbers.

We assume  $\epsilon = p/q$  for some integers  $p, q > 0$ . Let  $\mathcal{C}(I)$  be the covering of  $I$ , which is a set of  $\epsilon$ -cubes

$$c_{j_1, \dots, j_n} = \{x = (x_i) \in I \mid \epsilon j_i \leq x_i \leq \epsilon(j_i + 1)\},$$

for  $j_i = 1, \dots, [q/p] + 1$ . We can easily see that  $\mathcal{C}(I)$  attains the minimum number of  $\epsilon$ -cubes covering  $I$  and the number is  $(\epsilon^{-1} + 1)^n = \frac{\epsilon^{-n}}{n!} + \mathcal{O}(\epsilon^{-(n-1)})$ . We show that we can find a subset of  $\mathcal{C}(I)$  which cover  $\Delta_{S_n}$  and whose cardinality is  $\frac{\epsilon^{-n}}{n!} + \mathcal{O}(\epsilon^{-(n-1)})$ . The proof is as follows. At first, we calculate the number  $A$  of cubes in  $\mathcal{C}(I)$  which intersect with the boundary of  $\sigma \cdot \Delta$ . Then since the number of the orbit of the cubes which do not intersect with the boundary of  $\sigma \cdot \Delta$  is  $n!$ , if  $A$  is  $\mathcal{O}(\epsilon^{-(n-1)})$ , we can find the covering whose cardinality is  $\frac{\epsilon^{-n}}{n!} + \mathcal{O}(\epsilon^{-(n-1)})$ . Since  $\sigma \cdot \Delta$  is  $\{x \in I \mid x_{\sigma^{-1}(1)} \geq x_{\sigma^{-1}(2)} \geq \dots \geq x_{\sigma^{-1}(n)}\}$ , any boundary of  $\sigma \cdot \Delta$  is of the form  $\{x \in I \mid x_{\sigma^{-1}(1)} \geq \dots \geq x_{\sigma^{-1}(i)} = x_{\sigma^{-1}(i+1)} \geq \dots \geq x_{\sigma^{-1}(n)}\}$ .

From here, we fix  $\sigma$  and  $i$ . Consider the canonical projection  $\pi : \mathbb{R}^n \rightarrow \mathbb{R}^{n-1}$  which sends  $x_{\sigma^{-1}(i)}$ -axis to zero.  $\pi$  induces the map  $\tilde{\pi} : \mathcal{C}(I) \rightarrow \mathcal{C}(\pi(I))$ , where  $\mathcal{C}(\pi(I))$  is the covering of  $\pi(I)$ . Let  $\mathcal{C}(I)_B$  denote the subset of cubes in  $\mathcal{C}(I)$  which intersect with the set  $B = \{x \in I \mid x_{\sigma^{-1}(i)} = x_{\sigma^{-1}(i+1)}\}$ . Then we can see that  $\tilde{\pi}$  is injective on  $\mathcal{C}(I)_B$  as follows. Assume that there are two cubes in  $\mathcal{C}(I)_B$  whose images by  $\tilde{\pi}$  are equal. Let us denote the centers of two cubes by  $c_{j_1, \dots, j_n}$  and  $c_{k_1, \dots, k_n}$ . Then, since  $\pi$  only kills  $x_{\sigma^{-1}(i)}$ ,  $j_p = k_p$  holds for  $p \neq \sigma^{-1}(i)$ . But since  $c_{j_1, \dots, j_n}$  and  $c_{k_1, \dots, k_n}$  are in  $\mathcal{C}(I)_B$ , we have  $j_{\sigma^{-1}(i)} = j_{\sigma^{-1}(i+1)}$  and  $k_{\sigma^{-1}(i)} = k_{\sigma^{-1}(i+1)}$ . Hence  $j_p = k_p$  for any  $p$  and  $\tilde{\pi}$  is injective on  $\mathcal{C}(I)_B$ .

Next, let  $\mathcal{C}(I)_{\bar{B}}$  be the subset of  $\epsilon$ -cubes in  $\mathcal{C}(I)$  which intersect a boundary of  $\sigma \cdot \Delta$  for some  $\sigma$ . We see that the cardinality of  $\mathcal{C}(I)_{\bar{B}}$  is bounded by  $e\epsilon^{-(n-1)}$  for some constant  $e > 0$ . Since the number of components of the boundaries is finite, we prove the claim for a component  $B$ . As we see before,  $\tilde{\pi}|_{\mathcal{C}(I)_B}$  is injective. This result implies that the number of cubes that intersect  $B$  is bounded by a number of  $\epsilon$ -cubes in  $\mathcal{C}(\pi(I)) = \epsilon^{-(n-1)}$ . Put  $\mathcal{C}(I)_F = \mathcal{C}(I) - \mathcal{C}(I)_{\bar{B}}$ . Then we note that the action of  $S_n$  on  $\mathcal{C}(I)_F$  is free, namely the number of the orbit of any cube in  $\mathcal{C}(I)_F$  is  $|S_n|$ . Hence,

$$|\mathcal{C}(I)_F \cap \Delta| = |\{c \in \mathcal{C}(I) \mid c \subset \Delta\}| = 1/|S_n| |\mathcal{C}(I)_F| \leq \epsilon^{-n}/|S_n|.$$

Here,  $(\mathcal{C}(I)_F \cap \Delta) \cup \mathcal{C}(I)_{\tilde{B}}$  gives the covering of  $\Delta$ . This covering gives

$$\mathcal{N}_{\varepsilon, \infty}(\Delta) \leq \frac{\varepsilon^{-n}}{n!} + e\varepsilon^{-(n-1)}.$$

□

*Proof of Lemma 2.* By Proposition 3, we have  $\tilde{\Delta}_G$  satisfying two conditions above. Since the covering of  $\tilde{\Delta}_G$  induces the covering of  $\Delta_G$  by the condition 2,  $\mathcal{N}_{\varepsilon, \infty}(\Delta_G) \leq \mathcal{N}_{\varepsilon, \infty}(\tilde{\Delta}_G)$ . On the other hand, by the condition 1, we have  $\mathcal{N}_{\varepsilon, \infty}(\tilde{\Delta}_G) \leq |S_n|/|G| \cdot \mathcal{N}_{\varepsilon, \infty}(\Delta_{S_n})$ . Combining with Lemma 1, we have the desired result. □

*Proof of Proposition 1.* For the claim, assume that an action of  $G$  preserves distance, namely,  $\|x - x'\|_2 = \|g(x) - g(x')\|_2$  holds. We show that  $d_G(y, y') = \inf_{x, x' \in \mathbb{R}^n} \{\|x - x'\|_2 | \phi_G(x) = y, \phi_G(x') = y'\}$ . Consider the sum  $\|x - b_1\|_2 + \|a_2 - b_2\|_2 + \dots + \|a_n - x'\|_2$  and take an element  $g \in G$  such that  $a_2 = g \cdot b_1$ . Then,  $\|x - b_1\|_2 + \|a_2 - b_2\|_2 = \|x - b_1\|_2 + \|g \cdot b_1 - b_2\|_2 = \|x - b_1\|_2 + \|g \cdot b_1 - b_2\|_2 = \|x - b_1\|_2 + \|b_1 - g^{-1} \cdot b_2\|_2 \geq \|x - g^{-1} \cdot b_2\|_2$ . By repeating this process, we have  $\|x - b_1\|_2 + \|a_2 - b_2\|_2 + \dots + \|a_n - x'\|_2 \geq \|x - g \cdot x'\|_2$  for some  $g \in G$ . Hence,  $d_G(y, y') = \inf_{x, x' \in I} \{\|x - x'\|_2 | \phi_G(x) = y, \phi_G(x') = y'\}$ . This implies  $d_G(y, y') = 0 \Rightarrow y = y'$ . □

*Proof of Proposition 3.* We confirm that  $\tilde{\Delta}_G$  satisfies both the conditions 1 and 2. As the action of  $G$  preserves the distance,  $g_k : \Delta_{S_n} \rightarrow g_k \cdot \Delta_{S_n}$  is an isomorphism on metric spaces. Hence, condition 1 is satisfied.

For condition 2, we consider  $y \in \Delta_G = \phi_G(I)$ . Then, there is an element  $x \in I$  such that  $y = \phi_G(x)$ . As  $I = \cup_{\sigma \in S_n} \sigma \cdot \Delta_{S_n}$ , there exist  $\sigma \in S_n$  and  $z \in \Delta_{S_n}$  such that  $x = \sigma \cdot z$ .

In contrast, as  $\{g_1, \dots, g_K | g_k \in G\}$  is a complete system of representatives of  $G \setminus S_n$ , there exist  $\tau \in G$  and  $g_k$  such as  $\sigma = \tau \cdot g_i$ . Then  $\phi_G(g_k z) = \phi_G(\tau \cdot g_k z) = \phi_G(x) = y$  and  $g_k \cdot z \in \tilde{\Delta}_G$ . Hence  $\phi_G(\tilde{\Delta}_G) = \Delta_G$ . □

## A.2 PROOF FOR SECTION 3.2

*Proof of Proposition 4.* We prove  $\hat{\phi}_G$  is injective and surjective. Assume  $f \in C(\Delta_G)$  and put  $\hat{\phi}_G(f) = f \circ \phi_G$ . Then since  $\phi_G$  is  $G$ -invariant, so is  $\hat{\phi}_G(f)$ . Also, since  $\phi_G$  is surjective,  $\hat{\phi}_G$  is injective. Take  $g \in C^G(I)$ , then we define  $f \in C(\Delta_G)$  as follows; for any  $y \in \Delta_G$ , take  $x \in I$  such that  $\phi_G(x) = y$  and define  $f(y) = g(x)$ . This map is well defined because  $g$  is  $G$ -invariant.  $\hat{\phi}_G(f)(x) = f \circ \phi_G(x) = f(y) = g(x)$ . Hence, we obtain the desired result.

Next, we prove the Lipschitz properties. Take  $f \in C(\Delta_G)$  and assume  $f$  is  $K$ -Lipschitz. Then for any  $x, x' \in I$ ,

$$d_G(\phi_G(x), \phi_G(x')) \geq Kd(f(\phi_G(x)), f(\phi_G(x'))),$$

by  $K$ -Lipschitz property of  $f$ . By the definition of  $d_G$ , we have  $d_G(\phi_G(x), \phi_G(x')) \leq d(x, x')$ . Hence,  $\hat{\phi}_G(f)$  is  $K$ -Lipschitz continuous. Conversely, assume  $\hat{\phi}_G(f)$  is  $K$ -Lipschitz. Take any  $y, y' \in I$ , then for any  $x, x' \in I$  satisfying  $\phi_G(x) = y, \phi_G(x') = y'$ ,

$$d(x, x') \geq Kd(f(\phi_G(x)), f(\phi_G(x'))) = d(f(y), f(y')),$$

by  $K$ -Lipschitz property of  $\hat{\phi}_G(f)$ . Hence by taking infimum of the left hand side, we have

$$d_G(y, y') = \inf d_G(\phi_G(x), \phi_G(x')) \geq Kd(f(y), f(y')).$$

Hence,  $f$  is  $K$ -Lipschitz. □

*Proof of Proposition 2.* We first note that  $\phi$  is the identity map on  $\Delta$ , because elements in  $\Delta$  are sorted. This implies  $\Delta \cong \phi(\Delta)$ . Therefore, it is sufficient to show  $\Delta \cong \Delta_{S_n}$ . As  $\Delta$  is a subset of  $I$ , we have the distance preserving map  $\phi_{S_n \upharpoonright \Delta} : \Delta \rightarrow \Delta_{S_n}$ .

Then, we show that  $\phi_{S_n \upharpoonright \Delta}$  is a bijection. *Injectivity:* Let us take any  $x, y \in \Delta$  such that  $\phi_{S_n \upharpoonright \Delta}(x) = \phi_{S_n \upharpoonright \Delta}(y)$ . Then  $x = g \cdot y$  for some  $g \in S_n$ . However, as  $y$  is in  $\Delta$ ,  $\{g \cdot y | g \in S_n\} \cap \Delta = \{y\}$ . Hence,  $x = y$ . *Surjectivity:* Take any  $z \in \Delta_{S_n}$ , then there is  $x \in I$  such that  $z = \phi_{S_n}(x)$ . By the construction of  $\Delta$ , there is  $g \in S_n$  and  $y \in \Delta$  that satisfies  $x = g \cdot y$ . Hence,  $z = \phi_{S_n}(x) = \phi_{S_n}(g \cdot y) = \phi_{S_n}(y)$ . □

*Proof of Proposition 5.* Firstly, we show  $\widehat{\phi}_G^{-1}(f) \in \mathcal{F}(I)$  with any  $f \in \mathcal{F}^G(I)$ . For  $f \in \mathcal{F}^G(I)$ , we consider  $\widehat{\phi}_G^{-1}(f) \in C(\Delta_G)$  as Proposition 4. Suppose  $f$  and  $f'$  are  $K$ -Lipschitz continuous, then  $\widehat{\phi}_G^{-1}(f)$  is also  $K$ -Lipschitz continuous by Proposition 4. Since Zhang et al. [2018] states that Lipschitz continuous functions are represented by DNNs, we have  $\widehat{\phi}_G^{-1}(f) \in \mathcal{F}(\Delta_G)$ .

Fix  $f_1, f_2 \in \mathcal{F}^G(I)$ . Then, there exist  $f'_1, f'_2 \in \mathcal{F}(\Delta_G)$  such as  $f_1 = \widehat{\phi}_G(f'_1)$  and  $f_2 = \widehat{\phi}_G(f'_2)$ . Then, we have

$$\|f_1 - f_2\|_{L^\infty(I)} = \|\widehat{\phi}_G(f'_1) - \widehat{\phi}_G(f'_2)\|_{L^\infty(I)} = \|f'_1 \circ \phi_G - f'_2 \circ \phi_G\|_{L^\infty(I)} \leq \|f'_1 - f'_2\|_{L^\infty(\Delta_G)}.$$

Based on the result, we can bound  $\mathcal{N}_{\varepsilon, \infty}(\mathcal{F}^G(I))$  by  $\mathcal{N}_{\varepsilon, \infty}(\mathcal{F}(\Delta_G))$ . Let us define  $N := \mathcal{N}_{\varepsilon, \infty}(\mathcal{F}(\Delta_G))$ . Then, there exist  $f'_1, \dots, f'_N$  such that for any  $f' \in \mathcal{F}(\Delta_G)$ , there exists  $j \in \{1, \dots, N\}$  such as  $\|f'_j - f'\|_{L^\infty(\Delta_G)} \leq \varepsilon$ . Here, for any  $f \in \mathcal{F}^G(I)$ , there exists  $f_j := \widehat{\phi}_G^{-1}(f'_j) \in \mathcal{F}^G(I)$  and it satisfies  $\|f - f_j\|_{L^\infty(I)} \leq \|\widehat{\phi}_G(f) - \widehat{\phi}_G(f_j)\|_{L^\infty(\Delta_G)} \leq \varepsilon$ . Then, we obtain the statement.  $\square$

*Proof of Theorem 2.* Combining Proposition 5 and 6, we obtain a bound for  $\log \mathcal{N}_{2C_\Delta \delta, \infty}(\mathcal{F}^G(I))$ . Then, we substitute it into (3) and obtain the statement of Theorem 2.  $\square$

### A.3 PROOF FOR SECTION 4

*Proof of Proposition 6.* We bound a covering number of a set of  $C_\Delta$ -Lipschitz continuous functions on  $\Delta$ . Let  $\{x_1, \dots, x_K\} \subset \Delta$  by a set of centers of  $\delta$ -covering set for  $\Delta$ . By Lemma 1, we set  $K = C/(|G| \delta^n)$  with  $\delta$  with a parameter  $\delta > 0$ , where  $C > 0$  is a constant.

We will define a set of vectors to bound the covering number. We define a discretization operator  $A : \mathcal{F}(\Delta_G) \rightarrow \mathbb{R}^K$  as

$$Af = (f(x_1)/\delta, \dots, f(x_K)/\delta)^\top.$$

Let  $\mathcal{B}_\delta(x)$  be a ball with radius  $\delta$  in terms of the  $\|\cdot\|_\infty$ -norm. For two functions  $f, f' \in \mathcal{F}(\Delta_G)$  such as  $Af = Af'$ , we obtain

$$\begin{aligned} \|f - f'\|_{L^\infty(I)} &= \max_{k=1, \dots, K} \sup_{x \in \mathcal{B}_\delta(x_k)} |f(x) - f'(x)| \\ &\leq \max_{k=1, \dots, K} \sup_{x \in \mathcal{B}_\delta(x_k)} |f(x) - f(x_k)| + |f'(x_k) - f(x_k)| \\ &\leq 2C_\Delta \delta, \end{aligned}$$

where the second inequality follows  $f(x_k) = f'(x_k)$  for all  $k = 1, \dots, K$  and the last inequality follows the  $C_\Delta$ -Lipschitz continuity of  $f$  and  $f'$ . By the relation, we can claim that  $\mathcal{F}(\Delta_G)$  is covered by  $2C_\Delta \delta$  balls whose center is characterized by a vector  $b \in \mathbb{R}^K$  such as  $b = Af$  for  $f \in \mathcal{F}(\Delta_G)$ . Namely,  $\mathcal{N}_{2C_\Delta \delta, \infty}(\mathcal{F}(\Delta_G))$  is bounded by a number of possible  $b$ .

Then, we construct a specific set of  $b$  to cover  $\mathcal{F}(\Delta_G)$ . Without loss of generality, assume that  $x_1, \dots, x_K$  are ordered satisfies such as  $\|x_k - x_{k+1}\|_\infty \leq 2\delta$  for  $k = 1, \dots, K - 1$ . By the definition,  $f \in \mathcal{F}(\Delta_G)$  satisfies  $\|f\|_{L^\infty(\Delta)} \leq B$ .  $b_1 = f(x_1)$  can take values in  $[-B/\delta, B/\delta]$ . For  $b_2 = f(x_2)$ , since  $\|x_1 - x_2\|_\infty \leq 2\delta$  and hence  $|f(x_1) - f(x_2)| \leq 2C_\Delta \delta$ , a possible value for  $b_2$  is included in  $[(b_1 - 2\delta)/\delta, (b_1 + 2\delta)/\delta]$ . Hence,  $b_2$  can take a value from an interval with length 4 given  $b_1$ . Recursively, given  $b_k$  for  $k = 1, \dots, K - 1$ ,  $b_{k+1}$  can take a value in an interval with length 4.

Then, we consider a combination of the possible  $b$ . Simply, we obtain the number of vectors is  $(2cB/\delta) \cdot (4c)^{K-1} \leq (8c^2B/\delta)^{K-1}$  with a universal constant  $c \geq 1$ . Then, we obtain that

$$\log \mathcal{N}_{2C_\Delta \delta, \infty}(\mathcal{F}(\Delta_G)) \leq (K - 1) \log(8c^2B/\delta).$$

Then, we specify  $K$  which describe a size of  $\Delta$  through the set of covering centers.  $\square$

## A.4 PROOF FOR SECTION 5

**Proposition 7.** *Suppose  $G$  is transitive. Then, for any  $\varepsilon > 0$ , we have*

$$\mathcal{N}_{\varepsilon, \infty}(\tilde{\mathcal{F}}^G(I)) \leq \mathcal{N}_{\varepsilon, \infty}(\mathcal{F}^{\text{St}(G)}(I)).$$

*Proof of Proposition 7.* The first statement simply follows Proposition 11 with setting  $J = 1$ , since  $g \in G$  is transitive. In the case of  $S_n$ , we have  $J = 1$  and  $\text{Stab}(1) \cong S_{n-1}$ . This gives the second statement.  $\square$

*Proof of Theorem 3 and Corollary 2.* For Theorem 3, we combine the bound (3), Lemma 2 and Proposition 5. Thus, we obtain the statement.

For Corollary 2, since  $S_n$  is transitive, the statement obviously holds with  $|\text{St}(G)| = |S_{n-1}| = (n-1)!$ .  $\square$

## A.5 PROOF FOR SECTION 6

To prove Theorem 4, we consider a Sort map and show that DNNs can represent the map. Let  $\max^{(k)}(x_1, \dots, x_n)$  be a map which returns the  $k$ -th largest value of inputted elements  $x_1, \dots, x_n$  for  $k = 1, \dots, n$ . Then, we provide a form of Sort as

$$\text{Sort}(x_1, \dots, x_n) = (\max^{(1)}(x_1, \dots, x_n), \dots, \max^{(n)}(x_1, \dots, x_n)).$$

To represent it, we provide the following propositions.

**Proposition 8.**  *$\max^{(j)}(z_1, \dots, z_N)$  and  $\min^{(j)}(z_1, \dots, z_N)$  are represented by an existing deep neural networks with an ReLU activation for any  $j = 1, \dots, N$ .*

*Proof of Proposition 8.* Firstly, since

$$\max(z_1, z_2) = \max(z_1 - z_2, 0) + z_2,$$

and

$$\min(z_1, z_2) = -\max(z_1 - z_2, 0) + z_1$$

hold, we see the case of  $j = 1, N = 2$ . By repeating  $\max(z_1, z_2)$ , we construct  $\max^{(1)}(z_1, \dots, z_N)$  and  $\min^{(1)}(z_1, \dots, z_N)$ . Namely, we prove the claim in the case of  $j = 1$  and arbitrary  $N$ . At first, we assume  $N$  is even without loss of generality, then we divide the set  $\{z_1, \dots, z_N\}$  into sets of pairs  $\{(z_1, z_2), \dots, (z_{N-1}, z_N)\}$ . Then, by taking a max operation for each of the pairs, we have  $\{y_1 = \max(z_1, z_2), \dots, y_{N/2} = \max(z_{N-1}, z_N)\}$ . We repeat this process to terminate. Then we have  $\max^{(1)}(z_1, \dots, z_N)$ , which is represented by an existing deep neural network. Similarly, we have  $\min^{(1)}(z_1, \dots, z_N)$ . Finally, we prove the claim on  $j = 2, \dots, N$  by induction. Assume that for any  $N$  and  $\ell < j$ ,  $\max^{(\ell)}(z_1, \dots, z_N)$  is represented by a deep neural network. We construct  $\max^{(j)}(z_1, \dots, z_N)$  as follows: since

$$\max^{(j-1)}(z_{-\ell}) = \begin{cases} \max^{(j-1)}(z_1, \dots, z_N) & (\text{if } z_{-\ell} \leq \max^{(j)}(z_1, \dots, z_N)) \\ \max^{(j)}(z_1, \dots, z_N) & (\text{otherwise}) \end{cases}$$

holds, we have  $\max^{(j)}(z_1, \dots, z_N) = \min(\{\max^{(j-1)}(Z_\ell) \mid \ell = 1, \dots, N\})$ . By inductive hypothesis, the right hand side is represented by a deep neural network.  $\square$

Further, we provide the following result for a technical reason.

**Proposition 9.** *The restriction map*

$$\Lambda : \mathcal{F}^{S_n}(I) \rightarrow \mathcal{F}(\Delta_{S_n})$$

*is bijective, where  $\Lambda(f) = f|_{\Delta_{S_n}}$ .*

*Proof of Proposition 4.* To show the Proposition, we firstly define sorting layers which is an  $S_n$ -invariant network map from  $I$  to  $\Delta$ . Then by Proposition 8,  $\text{Sort}(x_1, \dots, x_n)$  is also a function by an  $S_n$ -invariant deep neural network and  $\text{Sort}(x_1, \dots, x_n)$  is the function from  $I$  to  $\Delta$ .

By using this function, we define the inverse of  $\Lambda$ . For any function  $f$  by a deep neural network on  $\Delta$ , we define  $\Phi(f) = f \circ \text{Sort}$ . We confirm  $\Lambda \circ \Phi = \text{id}_{\mathcal{F}_\Delta}$  and  $\Phi \circ \Lambda = \text{id}_{\mathcal{F}_{S_n}}$ . Since we have

$$\Lambda \circ \Phi(f) = \Lambda \circ f \circ \text{Sort} = (f \circ \text{Sort})|_{\Delta} = f,$$

$\Lambda \circ \Phi$  is equal to  $\text{id}_{\mathcal{F}_\Delta}$ . Similarly,

$$\Phi \circ \Lambda(f) = \Phi \circ f|_{\Delta} = f|_{\Delta} \circ \text{Sort} = f,$$

where the last equality follows from the  $S_n$ -invariance of  $f$ . Hence, we have the desired result.  $\square$

Now, we are ready to prove Theorem 4.

*Proof of Theorem 4.* Let  $f^*$  be an  $S_n$ -invariant function on  $I$ . Then by Proposition 9, we have a function  $f$  on  $\Delta_{S_n}$  such that  $f^* = f \circ \text{Sort}$  holds. By Theorem 5 in Schmidt-Hieber [2017], for enough big  $N$ , there exists a constant  $c > 0$  and a neural network  $f'$  with at most  $\mathcal{O}(\log(N))$  layers and at most  $\mathcal{O}(N \log(N))$  nonzero weights such that  $\|f - f'\|_{L^\infty(I)} \leq cN^{-\alpha/p}$ . Then, we have

$$\|f^* - f' \circ \text{Sort}\|_{L^\infty(I)} = \|f \circ \text{Sort} - f' \circ \text{Sort}\|_{L^\infty(I)} \leq \|f - f'\|_{L^\infty(\Delta)} \leq \|f - f'\|_{L^\infty(I)} \leq cN^{-\alpha/p},$$

where  $f \circ \text{Sort}$  is a neural network with at most  $\mathcal{O}(\log(N)) + K_1$  layers and at most  $\mathcal{O}(N \log(N)) + K_2$  nonzero weights, where  $K_1$  and  $K_2$  are the number of layers and the number of nonzero weights of the neural network expressing Sort respectively. By replacing  $N^{-1}$  with  $\varepsilon$ , we have the desired inequality.  $\square$

## B GENERALIZATION BOUND FOR EQUIVALENT DNN WITHOUT TRANSITIVE ASSUMPTION

In this section, we provide a general version of the result in Section 5. Namely, we relax the transitive assumption in the section. To the goal, we newly define a general version of a stabilizer subgroup.

Let  $[n] = \{1, 2, \dots, n\}$  be an index set and  $G$  be a finite group action on  $[n]$ . For  $i \in [n]$ , we define the stabilizer subgroup  $\text{Stab}_G(i)$  associated with  $G$  as

$$\text{Stab}_G(i) = \{\sigma \in G \mid \sigma \cdot i = i\}.$$

We also consider the following decomposition of  $[n]$  as

$$[n] = \bigsqcup_{j \in \mathcal{J}} \mathcal{O}_j,$$

where  $\mathcal{J} \subset I$  and  $\mathcal{O}_j$  is a  $G$ -orbit of  $j$ , namely the set of the form  $G \cdot j$ . Any  $G$ -orbit  $G \cdot j$  is isomorphic to the set  $G/\text{Stab}(j)$ . We denote  $|\mathcal{J}|$  by  $J$  and  $|\mathcal{O}_j|$  by  $l_j$ . For each  $j \in \mathcal{J}$ , let  $G = \bigsqcup_{j \in \mathcal{J}} \bigsqcup_{k=1}^{l_j} \text{Stab}_G(j)\tau_{j,k}$  be the coset decomposition by  $\text{Stab}_G(j)$ . Then, we may assume that  $\tau_{j,k} \in G$  satisfies  $\tau_{j,k}^{-1}(j) = j + k$ .

Then, we provide another representation for equivariant functions from the following study.:

**Proposition 10** (Representation for Equivariant Functions Sannai et al. [2019]). *A map  $F: \mathbb{R}^n \rightarrow \mathbb{R}^n$  is  $G$ -equivariant if and only if  $F$  can be represented by  $F = (f_1 \circ \tau_{1,1}, f_1 \circ \tau_{1,2}, \dots, f_1 \circ \tau_{1,l_1}, f_2 \circ \tau_{2,1}, \dots, f_J \circ \tau_{J,l_J})^\top$  for some  $\text{Stab}_G(j)$ -invariant functions  $f_j: \mathbb{R}^n \rightarrow \mathbb{R}$ . Here,  $\tau_{j,k} \in G$  is regarded as a linear map  $\mathbb{R}^n \rightarrow \mathbb{R}^n$ .*

**Proposition 11.** *For any  $\varepsilon > 0$ , we have*

$$\tilde{\mathcal{N}}_{\varepsilon, \infty}(\tilde{\mathcal{F}}^G(I)) \leq \prod_{j \in \mathcal{J}} \mathcal{N}_{\varepsilon, \infty}(\mathcal{F}^{\text{Stab}_G(j)}(I_{l_j})),$$

where  $I_{l_j} = [0, 1]^{l_j}$ . Further, if  $G = S_n$ ,

$$\tilde{\mathcal{N}}_{\varepsilon, \infty}(\tilde{\mathcal{F}}^{S_n}(I)) \leq \mathcal{N}_{\varepsilon, \infty}(\mathcal{F}^{S_{n-1}}(I)).$$

*Proof of Proposition 11.* We put  $N_j = \mathcal{N}_{\varepsilon, \infty}(\mathcal{F}^{\text{Stab}_G(j)}(I))$ . For each  $j \in \mathcal{J}$ , by the definition of covering numbers, there exist  $f_j^{(1)}, \dots, f_j^{(N_j)} \in \mathcal{F}^{\text{Stab}_G(j)}(I_{l_j})$  such that for any  $f' \in \mathcal{F}^{\text{Stab}_G(j)}(I_{l_j})$ , there exists  $f_j^{(p)}$  satisfying  $\|f' - f_j^{(p)}\|_\infty < \varepsilon$ .

With a tuple  $(p_1, \dots, p_J)$ , we consider a map  $F_{p_1, \dots, p_J} : I \rightarrow \mathbb{R}^n$  from  $\tilde{\mathcal{F}}^G(I)$  and claim that balls  $\mathcal{B}_\varepsilon(F_{p_1, \dots, p_J})$  give a covering set of  $\tilde{\mathcal{F}}(I)$ . Put  $F_{p_1, \dots, p_J} = (f_1^{(p_1)} \circ \tau_{1,1}, f_1^{(p_1)} \circ \tau_{1,2}, \dots, f_1^{(p_1)} \circ \tau_{1,l_1}, f_2^{(p_2)} \circ \tau_{2,1}, \dots, f_J^{(p_J)} \circ \tau_{J,l_J})^\top$ . Then  $F_{p_1, \dots, p_J}$  is a  $G$ -equivariant map. Also, since  $\tau_{j,k}$  is a linear map by Proposition 10, we can represent  $\tau_{j,k}$  by DNNs. Hence,  $F_{p_1, \dots, p_J} \in \tilde{\mathcal{F}}^G(I)$  holds.

Fix  $F' \in \tilde{\mathcal{F}}^G(I)$  arbitrary. We have the representation  $F' = (f'_1 \circ \tau_{1,1}, f'_1 \circ \tau_{1,2}, \dots, f'_1 \circ \tau_{1,l_1}, f'_2 \circ \tau_{2,1}, \dots, f'_J \circ \tau_{J,l_J})^\top$  by Proposition 10. Then, we can find a corresponding  $F_{p_1, \dots, p_J}$  such as

$$\begin{aligned} \|F_{p_1, \dots, p_J} - F'\|_{L^\infty(I)} &= \max\{\|f_j^{(p_j)} \circ \tau_{j,k_j} - f'_j \circ \tau_{j,k_j}\|_\infty \mid 1 \leq k_j \leq |G/\text{Stab}_G(j)|, 1 \leq p_j \leq N_j\} \\ &= \max\{\|f_j^{(p_j)} - f'_j\|_\infty \mid 1 \leq p_j \leq N_j\} \\ &\leq \varepsilon. \end{aligned}$$

Hence, we have the first statement.

In the case of  $S_n$ , we have  $J = 1$  and  $\text{Stab}(1) \cong S_{n-1}$ . This gives the second statement.  $\square$

Then, we obtain the following general bound:

**Theorem 5** (Generalization of Equivariant DNN). *Suppose  $\tilde{f}^G \in \tilde{\mathcal{F}}^G(I)$  is uniformly bounded by 1. Then, for any  $\varepsilon > 0$ , the following inequality holds with probability at least  $1 - 2\varepsilon$ :*

$$R(\tilde{f}^G) \leq R_m(\tilde{f}^G) + \sqrt{\sum_{j \in \mathcal{J}} \frac{\tilde{c}}{|\text{Stab}_G(j)| m^{2/n}}} + \sqrt{\frac{2 \log(2/\varepsilon)}{m}}.$$

where  $\tilde{c} > 0$  is a constant which are independent of  $n$  and  $m$ .

We omit rigorous proof of Theorem (5), because it is almost same to that of Theorem 3.

## References

- Akiyoshi Sannai, Yuuki Takai, and Matthieu Cordonnier. Universal approximations of permutation invariant/equivariant functions by deep neural networks. *arXiv preprint arXiv:1903.01939*, 2019.
- Johannes Schmidt-Hieber. Nonparametric regression using deep neural networks with relu activation function. *arXiv preprint arXiv:1708.06633*, 2017.
- Liwen Zhang, Gregory Naitzat, and Lek-Heng Lim. Tropical geometry of deep neural networks. *arXiv preprint arXiv:1805.07091*, 2018.
